# Supplementary material for: Molecular Mechanism of Exogenous Selenium Affecting the Nutritional Quality, Species and Content of Organic Selenium in Mustard
Source: MDPI journal article supplement (doi:10.3390/agronomy13051425), 2023-05-21

**Table S1.** Transcriptome data statistics of different treatment groups

| Sample  | Raw_reads | Clean_reads | Error_rate | Q20   | Q30   | GC_pct |
|---------|-----------|-------------|------------|-------|-------|--------|
| WS_CK_1 | 21874743  | 21324562    | 0.03       | 97.32 | 92.7  | 45.9   |
| WS_CK_2 | 21645713  | 20604190    | 0.03       | 97.28 | 92.46 | 45.03  |
| WS_CK_3 | 21374492  | 20748685    | 0.03       | 97.24 | 92.34 | 44.78  |
| WS_5_1  | 23325380  | 23069280    | 0.03       | 97.3  | 92.69 | 45.02  |
| WS_5_2  | 21948662  | 21534312    | 0.03       | 97.72 | 93.39 | 44.16  |
| WS_5_3  | 21039785  | 20612134    | 0.03       | 97.59 | 93.09 | 44.22  |
| WS_10_1 | 23412414  | 23126040    | 0.03       | 97.42 | 92.92 | 45.57  |
| WS_10_2 | 23189662  | 22557210    | 0.03       | 97.29 | 92.43 | 44.77  |
| WS_10_3 | 23862838  | 23280532    | 0.03       | 97.35 | 92.56 | 44.94  |
| WS_20_1 | 22179600  | 21892648    | 0.03       | 97.5  | 93.11 | 45.68  |
| WS_20_2 | 25327581  | 24719744    | 0.03       | 97.08 | 91.98 | 45.06  |
| WS_20_3 | 23503783  | 22723337    | 0.03       | 97.71 | 93.37 | 45.03  |
| WS_40_1 | 23108706  | 22881848    | 0.03       | 97.63 | 93.38 | 46     |
| WS_40_2 | 23501155  | 22976668    | 0.03       | 97.71 | 93.36 | 45.13  |
| WS_40_3 | 24948672  | 24172623    | 0.03       | 97.68 | 93.29 | 45.22  |

**Table S2.** Annotated information of 60 differentially expressed genes screened from two modules

| Module    | Gene Cluster        | Gene name | Gene Description                                                  |
|-----------|---------------------|-----------|-------------------------------------------------------------------|
| blue      | Cluster-81632.49952 | TTL3      | inactive TPR repeat-containing thioredoxin TTL3-like              |
| blue      | Cluster-81632.35098 | NTRC      | NADPH-dependent thioredoxin reductase 3-like                      |
| blue      | Cluster-81632.32620 | MOT2      | molybdate transporter 2, transcript variant X1                    |
| blue      | Cluster-81632.38228 | TDX       | TPR repeat-containing thioredoxin TDX                             |
| blue      | Cluster-81632.49237 | APRL5     | 5'-adenylylsulfate reductase-like 5                               |
| blue      | Cluster-81632.33364 | APS1      | ATP sulfurylase 1                                                 |
| blue      | Cluster-81632.37541 | AAED1     | thioredoxin-like protein AAED1                                    |
| blue      | Cluster-81632.39167 | SULTR3;3  | probable sulfate transporter 3.3                                  |
| blue      | Cluster-81632.26232 | RWK1      | Eukaryotic glutathione synthase                                   |
| blue      | Cluster-81632.36048 | GSTF8     | glutathione S-transferase F8, chloroplastic-like                  |
| blue      | Cluster-81632.45303 | PIP5K9    | phosphatidylinositol 4-phosphate 5-kinase 9                       |
| blue      | Cluster-81632.31474 | STR2      | thiosulfate/3-mercaptopyruvate sulfurtransferase 1, mitochondrial |
| blue      | Cluster-81632.21924 | TRXM2     | Thioredoxin M2, chloroplastic                                     |
| blue      | Cluster-81632.40195 | DIT2-1    | dicarboxylate transporter 2.1, chloroplastic-like                 |
| blue      | Cluster-81632.32717 | ISS1      | aspartate aminotransferase-like                                   |
| blue      | Cluster-81632.45384 | GLX2-1    | hydroxyacylglutathione hydrolase 1, mitochondrial-like            |
| blue      | Cluster-81632.31680 | NTRC      | NADPH-dependent thioredoxin reductase 3                           |
| blue      | Cluster-81632.43978 | At1g43560 | thioredoxin Y2, chloroplastic                                     |
| blue      | Cluster-81632.15847 | GSTL3     | Glutathione S-transferase L3                                      |
| blue      | Cluster-81632.37348 | GSTF9     | Glutathione S-transferase F9                                      |
| blue      | Cluster-81632.36334 | GSTU16    | Glutathione S-transferase U16                                     |
| blue      | Cluster-81632.20905 | At2g37240 | thioredoxin-like protein AAED1, chloroplastic                     |
| blue      | Cluster-81632.41462 | SBP1      | selenium-binding protein 1-like                                   |
| blue      | Cluster-81632.56902 | SULTR4;1  | sulfate transporter 4.1, chloroplastic                            |
| blue      | Cluster-81632.31607 | GSTT2     | Glutathione S-transferase T2                                      |
| blue      | Cluster-81632.40972 | PHO1-H8   | Brassica napus phosphate transporter PHO1 homolog 8-like          |
| blue      | Cluster-81632.49268 | TXNRD2    | Thioredoxin reductase SEP1                                        |
| blue      | Cluster-81632.37650 | NTRC      | NADPH-dependent thioredoxin reductase 3-like                      |
| blue      | Cluster-81632.42766 | WDR26     | WD repeat-containing protein 26-like                              |
| blue      | Cluster-81632.38192 | GSTF9     | Glutathione S-transferase F9                                      |
| blue      | Cluster-81632.49952 | TTL3      | inactive TPR repeat-containing thioredoxin TTL3-like              |
| turquoise | Cluster-81632.28496 | yqjG      | glutathionyl-hydroquinone reductase YqjG-like                     |
| turquoise | Cluster-81632.37456 | APR2      | 5'-adenylylsulfate reductase 2                                    |
| turquoise | Cluster-81632.33037 | NIFS1     | Cysteine desulfurase NFS1                                         |
| turquoise | Cluster-81632.30832 | flad1     | 3'-phosphoadenosine 5'-phosphosulfate sulfotransferase            |
| turquoise | Cluster-81632.25707 | GSTU5     | Glutathione S-transferase U5                                      |
| turquoise | Cluster-81632.8037  | GSTU4     | Glutathione S-transferase U4                                      |
| turquoise | Cluster-81632.36631 | GSTZ1     | Glutathione S-transferase Z1                                      |
| turquoise | Cluster-81632.13618 | MGST3     | Microsomal glutathione S-transferase 3                            |
| turquoise | Cluster-81632.44615 | GSTF3     | Glutathione S-transferase F3                                      |
| turquoise | Cluster-81632.38210 | GPX6      | probable phospholipid hydroperoxide glutathione                   |

|           |                     |           |                                                                                 |
|-----------|---------------------|-----------|---------------------------------------------------------------------------------|
| turquoise | Cluster-81632.38203 | GPX6      | peroxidase 6<br>probable phospholipid hydroperoxide glutathione<br>peroxidase 6 |
| turquoise | Cluster-81632.36062 | SBP2      | Selenium-binding protein 2                                                      |
| turquoise | Cluster-81632.3700  | MGST3     | Microsomal glutathione S-transferase 3                                          |
| turquoise | Cluster-81632.35892 | STR16     | Thiosulfate sulfurtransferase 16                                                |
| turquoise | Cluster-81632.38978 | APS1      | ATP sulfurylase 1                                                               |
| turquoise | Cluster-81632.22952 | GPX2      | probable glutathione peroxidase 2                                               |
| turquoise | Cluster-81632.28993 | APR3      | 5'-adenylylsulfate reductase 3                                                  |
| turquoise | Cluster-81632.28990 | APR3      | 5'-adenylylsulfate reductase 3                                                  |
| turquoise | Cluster-81632.24050 | APR3      | 5'-adenylylsulfate reductase 3                                                  |
| turquoise | Cluster-81632.44949 | LGUL      | LGUL mRNA for putative lactoylglutathione<br>lyase                              |
| turquoise | Cluster-81632.29854 | GSTL2     | CDP-diacylglycerol--glycerol-3-phosphate<br>3-phosphatidyltransferase 2         |
| turquoise | Cluster-81632.38724 | At3g24170 | glutathione reductase, cytosolic-like                                           |
| turquoise | Cluster-81632.53780 | APR1      | 5'-adenylylsulfate reductase 1, chloroplastic                                   |
| turquoise | Cluster-81632.34125 | GSTU26    | Glutathione S-transferase U26                                                   |
| turquoise | Cluster-81632.38515 | NFS2      | cysteine desulfurase 1, chloroplastic-like                                      |
| turquoise | Cluster-81632.38510 | DHAR2     | glutathione S-transferase DHAR1, mitochondrial                                  |
| turquoise | Cluster-81632.40069 | DHAR1     | glutathione S-transferase DHAR1,<br>mitochondrial-like                          |
| turquoise | Cluster-81632.27420 | APR1      | 5'-adenylylsulfate reductase 1, chloroplastic                                   |
| turquoise | Cluster-81632.38725 | GR1       | glutathione reductase, cytosolic                                                |
| turquoise | Cluster-81632.28933 | APR3      | 5'-adenylylsulfate reductase 3, chloroplastic                                   |

---

**Figure S1.** Changes in water content of mustard treated with different concentrations of sodium selenite.

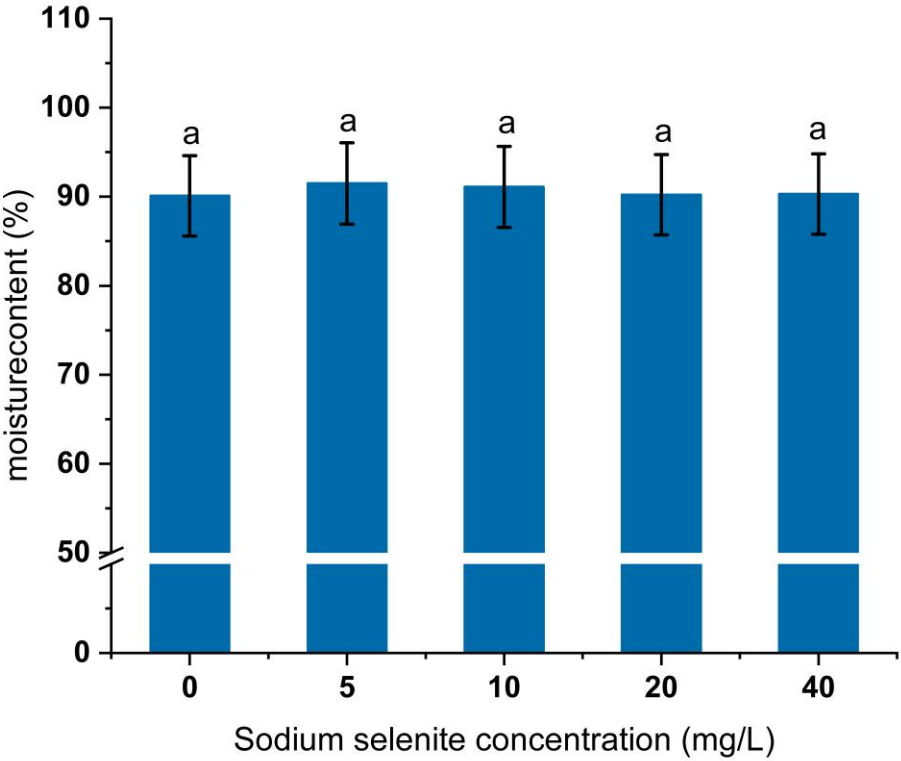

**Figure S2.** Heat map of correlation of gene expression level in test samples.

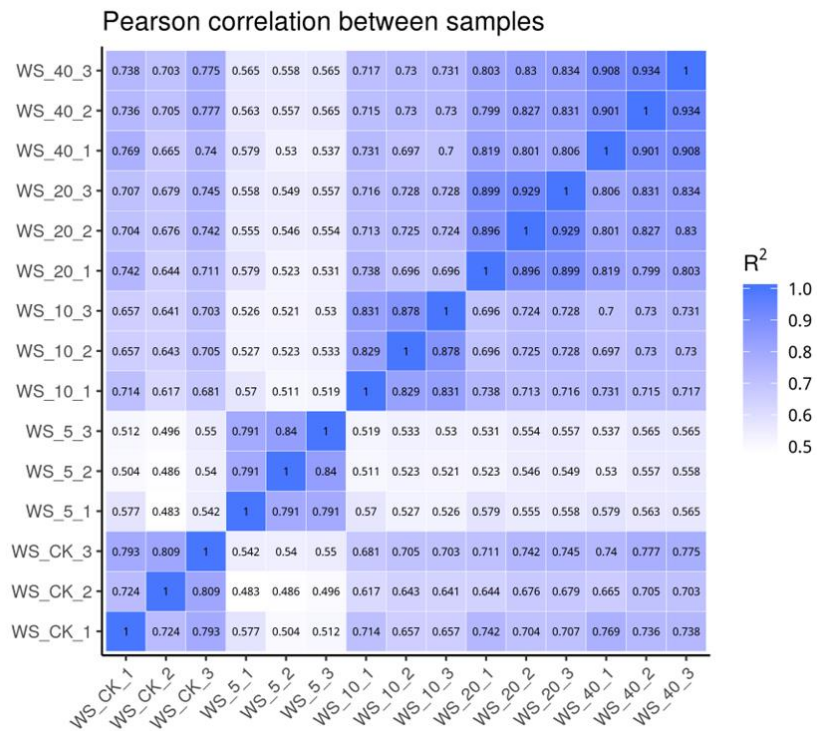

**Figure S3.** Statistics of differentially expressed genes in samples treated with different concentrations of  $\text{Na}_2\text{SeO}_3$ .

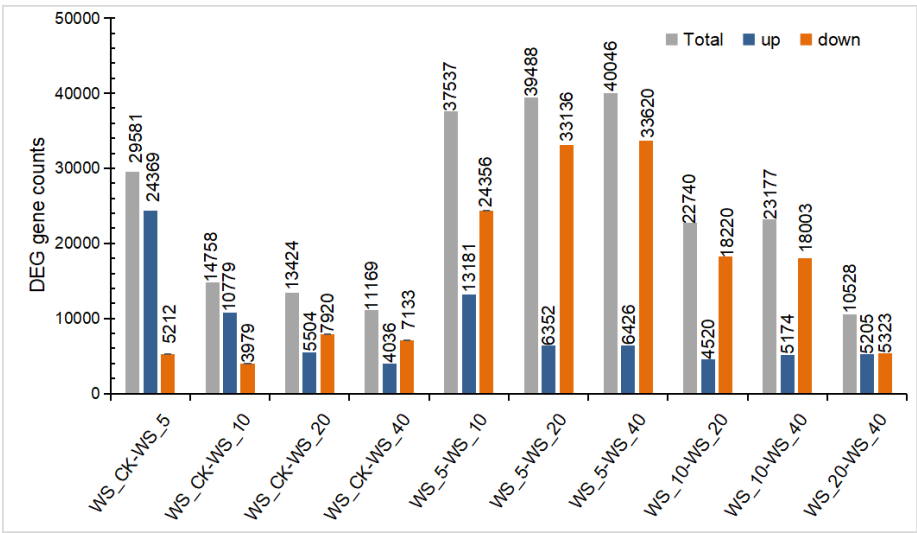

Supplement: s1 [file s1]
